# Supplementary material
Source: bioRxiv or medRxiv preprint supplement (https://www.biorxiv.org/highwire/filestream/7239/field_highwire_adjunct_files/0/026971-1.pdf)
Supplement: Supplementary file [file 026971-1.pdf]

**Table S1.** Significant trinucleoside counts in the guide sequence of functional sgRNAs\*

| Trinucleoside Count | Enrichment Ratio | P-Value |
|---------------------|------------------|---------|
| GGG                 | 0.39             | 4.9E-13 |
| GGC                 | 0.51             | 3.1E-10 |
| GUA                 | 2.83             | 9.0E-08 |
| AGA                 | 2.39             | 2.9E-07 |
| UAG                 | 2.69             | 9.3E-06 |
| GCC                 | 0.63             | 9.7E-06 |
| UUU                 | 0.40             | 4.1E-05 |
| UAC                 | 2.09             | 5.5E-05 |
| ACC                 | 1.72             | 7.9E-05 |
| AAG                 | 1.96             | 8.0E-05 |
| AUU                 | 0.48             | 2.0E-04 |
| AUA                 | 2.94             | 2.6E-04 |
| ACA                 | 1.68             | 2.7E-04 |
| CAA                 | 1.75             | 3.4E-04 |
| CCU                 | 0.65             | 3.5E-04 |
| CGG                 | 0.54             | 3.6E-04 |
| CCA                 | 1.42             | 5.0E-04 |
| AGU                 | 1.62             | 1.1E-03 |
| AUG                 | 1.63             | 1.2E-03 |
| UUG                 | 0.61             | 1.7E-03 |
| CGU                 | 1.75             | 4.5E-03 |
| GCG                 | 0.61             | 6.0E-03 |
| GAC                 | 1.44             | 6.3E-03 |
| UGG                 | 0.76             | 6.9E-03 |
| CUU                 | 0.68             | 7.0E-03 |
| UCA                 | 1.42             | 9.4E-03 |
| CAG                 | 1.26             | 1.5E-02 |
| GGU                 | 0.73             | 1.7E-02 |
| CUA                 | 1.70             | 1.9E-02 |
| UCU                 | 0.72             | 2.6E-02 |
| CAC                 | 1.34             | 2.7E-02 |
| UUC                 | 0.76             | 3.3E-02 |
| GCA                 | 1.30             | 3.4E-02 |
| GUU                 | 0.73             | 3.8E-02 |
| CCC                 | 0.76             | 4.1E-02 |
| GAU                 | 1.38             | 4.6E-02 |
| ACG                 | 1.44             | 4.8E-02 |

\* The enrichment ratio was determined by comparing the average nucleoside counts in the guide sequence of functional sgRNAs to that of non-functional sgRNAs. The p-values were calculated with Student's t-test.

**Table S2.** Base positions in the target site that were significantly associated with sgRNA activities\*

| Position-Specific Nucleoside | Enrichment Ratio | P-Value |
|------------------------------|------------------|---------|
| 3:A                          | 1.81             | 3.9E-05 |
| 3:C                          | 0.59             | 6.2E-06 |
| 3:G                          | 0.78             | 5.2E-02 |
| 3:T                          | 1.49             | 3.8E-03 |
| 9:A                          | 1.62             | 8.7E-04 |
| 9:C                          | 0.97             | 8.1E-01 |
| 9:G                          | 0.71             | 6.0E-03 |
| 9:T                          | 0.99             | 9.3E-01 |
| 10:A                         | 1.47             | 1.6E-02 |
| 10:C                         | 1.12             | 3.3E-01 |
| 10:G                         | 0.76             | 8.0E-03 |
| 10:T                         | 0.96             | 7.8E-01 |
| 11:A                         | 1.96             | 1.0E-05 |
| 11:C                         | 0.74             | 9.6E-03 |
| 11:G                         | 0.93             | 5.2E-01 |
| 11:T                         | 0.89             | 4.6E-01 |
| 12:A                         | 1.73             | 2.0E-04 |
| 12:C                         | 0.71             | 4.2E-03 |
| 12:G                         | 1.04             | 7.4E-01 |
| 12:T                         | 0.89             | 3.9E-01 |
| 14:A                         | 1.63             | 4.2E-04 |
| 14:C                         | 0.86             | 2.1E-01 |
| 14:G                         | 0.61             | 8.9E-06 |
| 14:T                         | 1.55             | 3.9E-03 |
| 15:A                         | 1.66             | 2.9E-04 |
| 15:C                         | 0.78             | 6.5E-02 |
| 15:G                         | 0.77             | 1.4E-02 |
| 15:T                         | 1.14             | 3.4E-01 |
| 16:A                         | 1.58             | 4.9E-03 |
| 16:C                         | 1.91             | 2.9E-08 |
| 16:G                         | 0.52             | 4.8E-10 |
| 16:T                         | 0.77             | 8.7E-02 |
| 17:A                         | 1.62             | 1.9E-03 |
| 17:C                         | 1.41             | 3.4E-03 |
| 17:G                         | 0.66             | 2.0E-04 |
| 17:T                         | 0.75             | 4.5E-02 |
| 18:A                         | 1.51             | 5.8E-03 |
| 18:C                         | 1.36             | 3.7E-03 |
| 18:G                         | 0.81             | 1.1E-01 |
| 18:T                         | 0.54             | 2.0E-05 |
| 19:A                         | 1.67             | 2.2E-03 |
| 19:C                         | 0.97             | 7.6E-01 |
| 19:G                         | 1.53             | 6.4E-04 |
| 19:T                         | 0.39             | 7.2E-10 |

|      |      |         |
|------|------|---------|
| 20:A | 2.23 | 4.6E-07 |
| 20:C | 0.35 | 4.9E-19 |
| 20:G | 3.16 | 9.5E-19 |
| 20:T | 0.51 | 7.0E-06 |
| 21:A | 0.98 | 8.6E-01 |
| 21:C | 1.64 | 5.4E-03 |
| 21:G | 1.29 | 3.7E-02 |
| 21:T | 0.66 | 9.3E-05 |
| 24:A | 1.38 | 1.3E-02 |
| 24:C | 1.30 | 4.1E-02 |
| 24:G | 0.41 | 4.7E-13 |
| 24:T | 1.59 | 1.2E-03 |

---

\* The PAM domain (NGG) occupies positions 21-23.

**Table S3. Significant features used to predict sgRNA potency.**

| <b>Feature Name</b>       | <b>Enrichment Ratio</b> | <b>P-Value</b> | <b>Feature Type</b> | <b>In Doench study</b> |
|---------------------------|-------------------------|----------------|---------------------|------------------------|
| Accessibility position 15 | 1.23                    | 1.8E-03        | Binary (0 or 1)     | No                     |
| Accessibility position 18 | 1.37                    | 8.9E-07        | Binary (0 or 1)     | No                     |
| Accessibility position 19 | 1.88                    | 3.2E-13        | Binary (0 or 1)     | No                     |
| Accessibility position 20 | 1.78                    | 3.0E-10        | Binary (0 or 1)     | No                     |
| Accessibility position 21 | 0.94                    | 1.9E-03        | Binary (0 or 1)     | No                     |
| Accessibility position 51 | 1.57                    | 1.1E-03        | Binary (0 or 1)     | No                     |
| Accessibility position 52 | 1.61                    | 3.0E-05        | Binary (0 or 1)     | No                     |
| Accessibility position 53 | 1.17                    | 4.8E-04        | Binary (0 or 1)     | No                     |
| Count A                   | 1.39                    | 9.3E-18        | Numerical           | No                     |
| Count G                   | 0.92                    | 6.2E-03        | Numerical           | No                     |
| Count U                   | 0.89                    | 1.9E-03        | Numerical           | No                     |
| Count AC                  | 1.47                    | 1.2E-08        | Numerical           | No                     |
| Count AG                  | 1.43                    | 1.3E-09        | Numerical           | No                     |
| Count CA                  | 1.38                    | 6.7E-09        | Numerical           | No                     |
| Count CU                  | 0.82                    | 1.2E-03        | Numerical           | No                     |
| Count GA                  | 1.37                    | 4.2E-06        | Numerical           | No                     |
| Count GC                  | 0.77                    | 3.2E-06        | Numerical           | No                     |
| Count GG                  | 0.64                    | 2.3E-11        | Numerical           | No                     |
| Count UA                  | 1.84                    | 1.1E-07        | Numerical           | No                     |
| Count UU                  | 0.59                    | 7.5E-08        | Numerical           | No                     |
| Count AAG                 | 1.96                    | 8.0E-05        | Numerical           | No                     |
| Count ACA                 | 1.68                    | 2.7E-04        | Numerical           | No                     |
| Count ACC                 | 1.72                    | 7.9E-05        | Numerical           | No                     |
| Count AGA                 | 2.39                    | 2.9E-07        | Numerical           | No                     |
| Count AGU                 | 1.62                    | 1.1E-03        | Numerical           | No                     |
| Count AUA                 | 2.94                    | 2.6E-04        | Numerical           | No                     |
| Count AUG                 | 1.63                    | 1.2E-03        | Numerical           | No                     |
| Count AUU                 | 0.48                    | 2.0E-04        | Numerical           | No                     |
| Count CAA                 | 1.75                    | 3.4E-04        | Numerical           | No                     |
| Count CCA                 | 1.42                    | 5.0E-04        | Numerical           | No                     |
| Count CCU                 | 0.65                    | 3.5E-04        | Numerical           | No                     |
| Count CGG                 | 0.54                    | 3.6E-04        | Numerical           | No                     |
| Count CGU                 | 1.75                    | 4.5E-03        | Numerical           | No                     |
| Count CUU                 | 0.68                    | 7.0E-03        | Numerical           | No                     |
| Count GAC                 | 1.44                    | 6.3E-03        | Numerical           | No                     |
| Count GCC                 | 0.63                    | 9.7E-06        | Numerical           | No                     |
| Count GCG                 | 0.61                    | 6.0E-03        | Numerical           | No                     |
| Count GGC                 | 0.51                    | 3.1E-10        | Numerical           | No                     |
| Count GGG                 | 0.39                    | 4.9E-13        | Numerical           | No                     |
| Count GUA                 | 2.83                    | 9.0E-08        | Numerical           | No                     |
| Count UAC                 | 2.09                    | 5.5E-05        | Numerical           | No                     |
| Count UAG                 | 2.69                    | 9.3E-06        | Numerical           | No                     |
| Count UCA                 | 1.42                    | 9.4E-03        | Numerical           | No                     |
| Count UGG                 | 0.76                    | 6.9E-03        | Numerical           | No                     |

|                        |      |         |                 |     |
|------------------------|------|---------|-----------------|-----|
| Count UUG              | 0.61 | 1.7E-03 | Numerical       | No  |
| Count UUU              | 0.40 | 4.1E-05 | Numerical       | No  |
| Duplex stability gRNA  | 0.93 | 1.5E-08 | Numerical       | No  |
| Duplex stability seed  | 0.91 | 4.9E-10 | Numerical       | No  |
| Folding stability gRNA | 0.61 | 6.7E-11 | Numerical       | No  |
| GC Content             | 0.93 | 2.1E-05 | Numerical       | Yes |
| Position 3 A           | 1.81 | 3.9E-05 | Binary (0 or 1) | No  |
| Position 3 C           | 0.59 | 6.2E-06 | Binary (0 or 1) | Yes |
| Position 3 U           | 1.49 | 3.8E-03 | Binary (0 or 1) | No  |
| Position 9 A           | 1.62 | 8.7E-04 | Binary (0 or 1) | No  |
| Position 9 G           | 0.71 | 6.0E-03 | Binary (0 or 1) | No  |
| Position 10 G          | 0.76 | 8.0E-03 | Binary (0 or 1) | No  |
| Position 11 A          | 1.96 | 1.0E-05 | Binary (0 or 1) | Yes |
| Position 11 C          | 0.74 | 9.6E-03 | Binary (0 or 1) | Yes |
| Position 12 A          | 1.73 | 2.0E-04 | Binary (0 or 1) | Yes |
| Position 12 C          | 0.71 | 4.2E-03 | Binary (0 or 1) | Yes |
| Position 14 A          | 1.63 | 4.2E-04 | Binary (0 or 1) | No  |
| Position 14 G          | 0.61 | 8.9E-06 | Binary (0 or 1) | Yes |
| Position 14 U          | 1.55 | 3.9E-03 | Binary (0 or 1) | No  |
| Position 15 A          | 1.66 | 2.9E-04 | Binary (0 or 1) | Yes |
| Position 16 A          | 1.58 | 4.9E-03 | Binary (0 or 1) | No  |
| Position 16 C          | 1.91 | 2.9E-08 | Binary (0 or 1) | No  |
| Position 16 G          | 0.52 | 4.8E-10 | Binary (0 or 1) | Yes |
| Position 17 A          | 1.62 | 1.9E-03 | Binary (0 or 1) | No  |
| Position 17 C          | 1.41 | 3.4E-03 | Binary (0 or 1) | No  |
| Position 17 G          | 0.66 | 2.0E-04 | Binary (0 or 1) | Yes |
| Position 18 A          | 1.51 | 5.8E-03 | Binary (0 or 1) | No  |
| Position 18 C          | 1.36 | 3.7E-03 | Binary (0 or 1) | Yes |
| Position 18 U          | 0.54 | 2.0E-05 | Binary (0 or 1) | Yes |
| Position 19 A          | 1.67 | 2.2E-03 | Binary (0 or 1) | No  |
| Position 19 G          | 1.53 | 6.4E-04 | Binary (0 or 1) | No  |
| Position 19 U          | 0.39 | 7.2E-10 | Binary (0 or 1) | Yes |
| Position 20 A          | 2.23 | 4.6E-07 | Binary (0 or 1) | No  |
| Position 20 C          | 0.35 | 4.9E-19 | Binary (0 or 1) | Yes |
| Position 20 G          | 3.16 | 9.5E-19 | Binary (0 or 1) | Yes |
| Position 20 U          | 0.51 | 7.0E-06 | Binary (0 or 1) | Yes |
| Position 21 C          | 1.64 | 5.4E-03 | Binary (0 or 1) | Yes |
| Position 21 U          | 0.66 | 9.3E-05 | Binary (0 or 1) | Yes |
| Position 24 G          | 0.41 | 4.7E-13 | Binary (0 or 1) | Yes |
| Position 24 U          | 1.59 | 1.2E-03 | Binary (0 or 1) | Yes |
| Repetitive bases       | 0.24 | 1.3E-11 | Binary (0 or 1) | No  |
| UUU in the seed region | 0.10 | 8.8E-07 | Binary (0 or 1) | No  |

---
